# Supplementary material for: Development of a Modular Vaccine Platform for Multimeric Antigen Display Using an Orthobunyavirus Model
Source: Vaccines (Basel). 2021 Jun 15;9(6):651. doi: 10.3390/vaccines9060651 (PMC8232151; doi:10.3390/vaccines9060651)
Supplement: Supplementary file 1 [file vaccines-09-00651-s001.zip › vaccines-1230291-supplementary.pdf]

# Supplementary materials

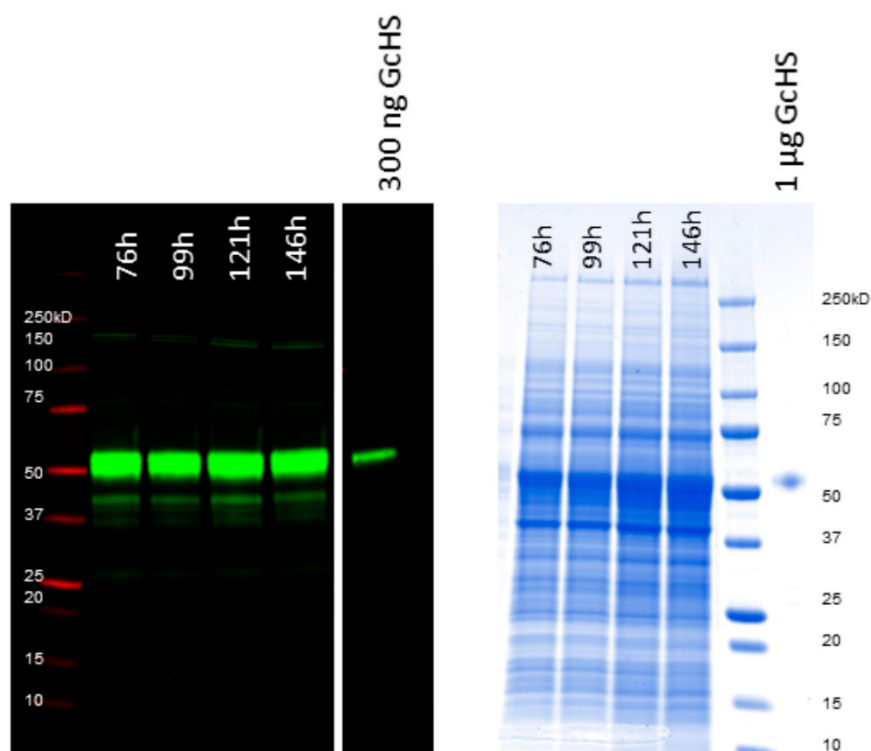

**Figure S1.** Analysis of the C1 production fermentation by Western blot (left) and Coomassie-staining (right). The sampling time points are indicated above the lanes. A previously produced C1-produced GcHS protein was used as a positive control (300ng or 1µg, respectively).

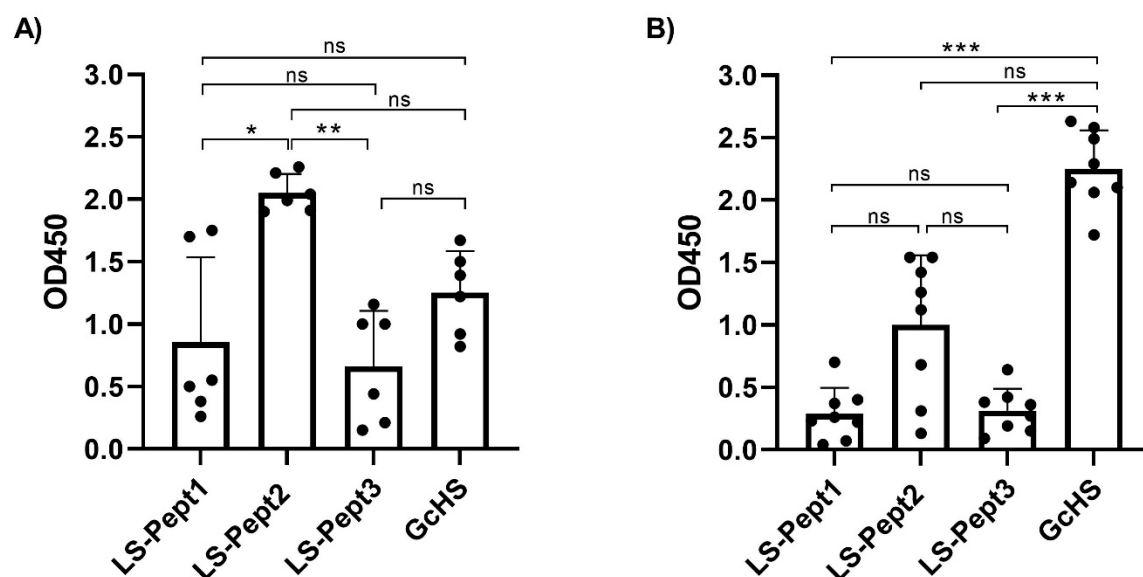

**Figure S2.** ELISA reactivity of peptide epitopes identified by Pepscan analysis. Three potentially immunogenic epitopes detected by Pepscan analysis were genetically fused to the LS scaffold. The resulting particles were coated on ELISA plates and their reactivity with sera from sheep (A) and cattle (B) that had recovered from SBV infection was tested by ELISA. The recombinant SBV GcHS was included as a positive control for ELISA-reactivity. Statistical analysis was performed using the Kruskal-Wallis test followed by Dunn's test for comparisons between individual groups. P values < 0.05 were considered significant. (\* P < 0.05; \*\* P < 0.01; \*\*\* P < 0.001).

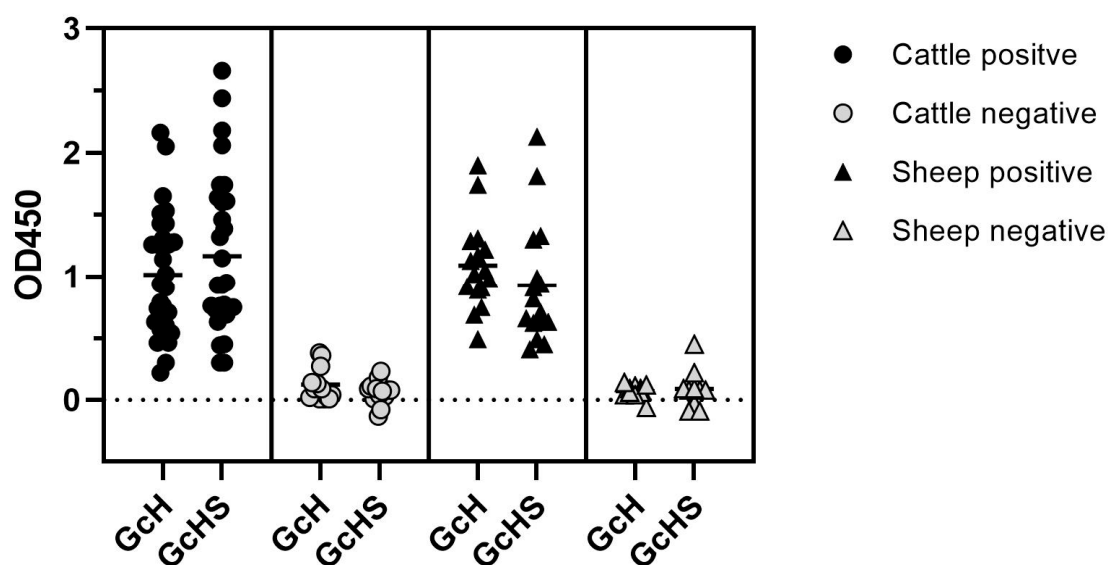

**Figure S3.** Comparative ELISA reactivity of the S2-produced SBV-GcH (GcH) and the C1-produced GcHS (GcHS) domains with SBV-antibody positive or negative serum samples.

**Table S1.** Summary of immunogenicity trials with an overview of vaccines, doses and animals

| Trial # | Immunogen                              | Abbreviation | Application groups               | Dose (antigen)            | Challenge dose                                        | Animals/group               |
|---------|----------------------------------------|--------------|----------------------------------|---------------------------|-------------------------------------------------------|-----------------------------|
| 1       | Monomeric Gc head                      | GcH          | 2x + adjuvant                    | 20 µg (s.c.) <sup>1</sup> | 10 <sup>4</sup> TCID <sub>50</sub> per animal (s.c)   | 9 IFNAR <sup>-/-</sup> mice |
|         | Gc head conjugated to LS (unsaturated) | LS-GcH       | 1x + adjuvant<br>2x w/o adjuvant |                           |                                                       |                             |
|         | Peptide #2 fused into LS               | LS-Pept2     | 2x + adjuvant                    | 20 µg (s.c.)              |                                                       |                             |
| 2       | Monomeric Gc head                      | GcH          | 2x + adjuvant                    | 20 µg (s.c.)              | 10 <sup>6.4</sup> TCID <sub>50</sub> per animal (s.c) | 9 IFNAR <sup>-/-</sup> mice |
|         | Gc head conjugated to LS; saturated    | Sat LS-GcH   | 1x + adjuvant                    |                           |                                                       |                             |
|         | Gc head conjugated to LS; unsaturated  | Unsat LS-GcH |                                  |                           |                                                       |                             |
| 3       | Monomeric Gc head-stalk                | GcHS         | 2x + adjuvant<br>1x + adjuvant   | 20 µg (s.c.)              | 10 <sup>4</sup> TCID <sub>50</sub> per animal (s.c.)  | 9 IFNAR <sup>-/-</sup> mice |
|         | Gc head-stalk conjugated to LS         | LS-GcHS      |                                  |                           |                                                       |                             |
| 4       | Gc head conjugated to LS               | LS-GcH       | 2x + adjuvant                    | 50 µg (s.c.)              | 1ml infectious serum per animal (s.c.)                | 4 calves                    |
|         | Gc head-stalk conjugated to LS         | LS-GcHS      |                                  |                           |                                                       |                             |
|         | Peptide fused in LS                    | LS-Pept2     |                                  |                           |                                                       |                             |

<sup>1</sup> s.c. subcutaneously

**Table S2.** Statistical analysis of survival curves shown in Figure 4 D) and F)

| Group           | Versus group    | Difference between groups <sup>1</sup> |
|-----------------|-----------------|----------------------------------------|
| GcH 2x + A      | mock            | ns                                     |
|                 | LS-GcH 2x + A   | ns                                     |
|                 | LS-Pept2        | *                                      |
|                 | GcH 1x + A      | ns                                     |
|                 | LS-GcH 1x + A   | ns                                     |
|                 | GcH 2x w/o A    | ns                                     |
|                 | LS-GcH 2x w/o A | ns                                     |
| LS-GcH 2x + A   | mock            | *                                      |
|                 | GcH 2x + A      | ns                                     |
|                 | LS-Pept2        | ns                                     |
|                 | GcH 1x + A      | **                                     |
|                 | LS-GcH 1x + A   | ns                                     |
|                 | GcH 2x w/o A    | *                                      |
|                 | LS-GcH 2x w/o A | *                                      |
| LS-Pept2        | mock            | ***                                    |
|                 | GcH 2x + A      | *                                      |
|                 | LS-GcH 2x + A   | ns                                     |
|                 | GcH 1x + A      | ****                                   |
|                 | LS-GcH 1x + A   | ns                                     |
|                 | GcH 2x w/o A    | ***                                    |
|                 | LS-GcH 2x w/o A | **                                     |
| GcH 1x + A      | mock            | ns                                     |
|                 | GcH 2x + A      | ns                                     |
|                 | LS-GcH 2x + A   | **                                     |
|                 | LS-Pept2        | ****                                   |
|                 | LS-GcH 1x + A   | **                                     |
|                 | GcH 2x w/o A    | ns                                     |
|                 | LS-GcH 2x w/o A | ns                                     |
| LS-GcH 1x + A   | mock            | *                                      |
|                 | GcH 2x + A      | ns                                     |
|                 | LS-GcH 2x + A   | ns                                     |
|                 | LS-Pept2        | ****                                   |
|                 | GcH 1x + A      | **                                     |
|                 | GcH 2x w/o A    | ns                                     |
|                 | LS-GcH 2x w/o A | *                                      |
| GcH 2x w/o A    | mock            | ns                                     |
|                 | GcH 2x + A      | ns                                     |
|                 | LS-GcH 2x + A   | *                                      |
|                 | LS-Pept2        | ***                                    |
|                 | GcH 1x + A      | ns                                     |
|                 | LS-GcH 1x + A   | *                                      |
|                 | LS-GcH 2x w/o A | ns                                     |
| LS-GcH 2x w/o A | mock            | ns                                     |
|                 | GcH 2x + A      | ns                                     |

|               |    |
|---------------|----|
| LS-GcH 2x + A | ns |
| LS-Pept2      | ** |
| GcH 1x + A    | ns |
| LS-GcH 1x + A | *  |
| GcH 2x w/o A  | ns |

<sup>1</sup>Mantel-Cox test (ns 0,1234; \*0.0332; \*\*0.0021; \*\*\*0.0002; \*\*\*\*<0.0001).

**Table S3.** Statistical analysis of survival curves shown in Figure 5 D) and F)

| Group                | versus group         | Difference between groups <sup>1</sup> |
|----------------------|----------------------|----------------------------------------|
| GcH 2x + A           | mock                 | ns                                     |
|                      | Sat. LS-GcH 2x + A   | *                                      |
|                      | unsat. LS-GcH 2x + A | *                                      |
|                      | GcH 1x + A           | ns                                     |
|                      | Sat. LS-GcH 1x + A   | ns                                     |
|                      | unsat. LS-GcH 1x + A | *                                      |
| Sat. LS-GcH 2x + A   | mock                 | **                                     |
|                      | GcH 2x + A           | *                                      |
|                      | unsat. LS-GcH 2x + A | ns                                     |
|                      | GcH 1x + A           | **                                     |
|                      | Sat. LS-GcH 1x + A   | ns                                     |
|                      | unsat. LS-GcH 1x + A | ns                                     |
| unsat. LS-GcH 2x + A | mock                 | **                                     |
|                      | GcH 2x + A           | *                                      |
|                      | Sat. LS-GcH 2x + A   | ns                                     |
|                      | GcH 1x + A           | **                                     |
|                      | Sat. LS-GcH 1x + A   | ns                                     |
|                      | unsat. LS-GcH 1x + A | ns                                     |
| GcH 1x + A           | mock                 | ns                                     |
|                      | GcH 2x + A           | ns                                     |
|                      | Sat. LS-GcH 2x + A   | **                                     |
|                      | unsat. LS-GcH 2x + A | **                                     |
|                      | Sat. LS-GcH 1x + A   | ns                                     |
|                      | unsat. LS-GcH 1x + A | **                                     |
| Sat. LS-GcH 1x + A   | mock                 | ns                                     |
|                      | GcH 2x + A           | ns                                     |
|                      | Sat. LS-GcH 2x + A   | ns                                     |
|                      | unsat. LS-GcH 2x + A | ns                                     |
|                      | GcH 1x + A           | ns                                     |
|                      | unsat. LS-GcH 1x + A | ns                                     |
| unsat. LS-GcH 1x + A | mock                 | **                                     |
|                      | GcH 2x + A           | *                                      |
|                      | Sat. LS-GcH 2x + A   | ns                                     |
|                      | unsat. LS-GcH 2x + A | ns                                     |
|                      | GcH 1x + A           | **                                     |
|                      | Sat. LS-GcH 1x + A   | ns                                     |

<sup>1</sup>Mantel-Cox test (ns 0,1234; \*0.0332; \*\*0.0021; \*\*\*0.0002; \*\*\*\*<0.0001).

**Table S4.** Statistical analysis of survival curves shown in Figure 6 D).

| Group          | versus group   | Difference between groups <sup>1</sup> |
|----------------|----------------|----------------------------------------|
| GcHS 2x + A    | mock           | ***                                    |
|                | GcHS 1x + A    | *                                      |
|                | LS-GcHS 2x + A | ns                                     |
|                | LS-GcHS 1x + A | ns                                     |
| GcHS 1x + A    | mock           | ns                                     |
|                | GcHS 2x + A    | *                                      |
|                | LS-GcHS 2x + A | **                                     |
|                | LS-GcHS 1x + A | **                                     |
| LS-GcHS 2x + A | mock           | ****                                   |
|                | GcHS 2x + A    | ns                                     |
|                | GcHS 1x + A    | **                                     |
|                | LS-GcHS 1x + A | ns                                     |
| LS-GcHS 1x + A | mock           | ****                                   |
|                | GcHS 2x + A    | ns                                     |
|                | GcHS 1x + A    | **                                     |
|                | LS-GcHS 2x + A | ns                                     |

<sup>1</sup> Mantel-Cox test (ns 0,1234; \*0.0332; \*\*0.0021; \*\*\*0.0002; \*\*\*\*<0.0001).
